# Supplementary material
Source: PubMed Central journal article supplement (PMC5583731)
Supplement: NIHMS900166-supplement-Supplemental_Figures.pdf [file NIHMS900166-supplement-Supplemental_Figures.pdf]

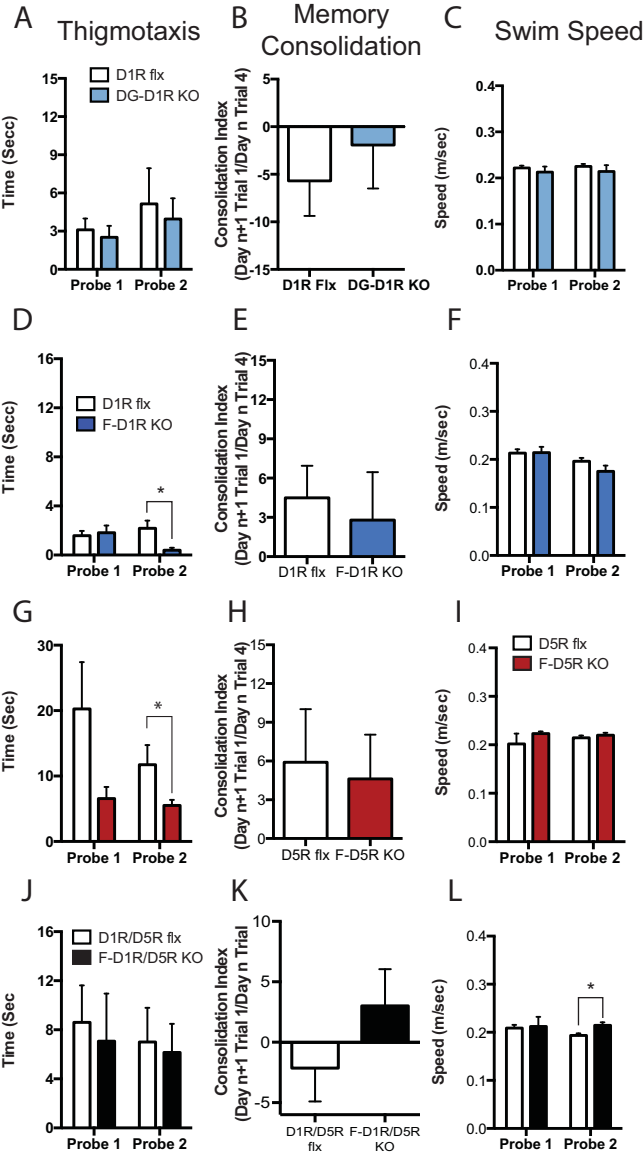

D1R/D5R flx

F-D1R/D5R KO

D1R Probe

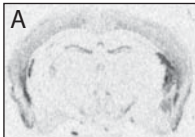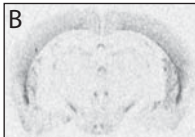

D5R Probe

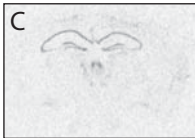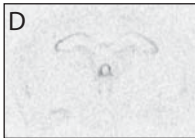

**A**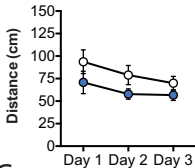**B**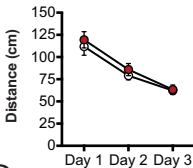**C**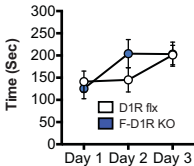**D**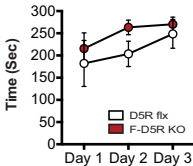

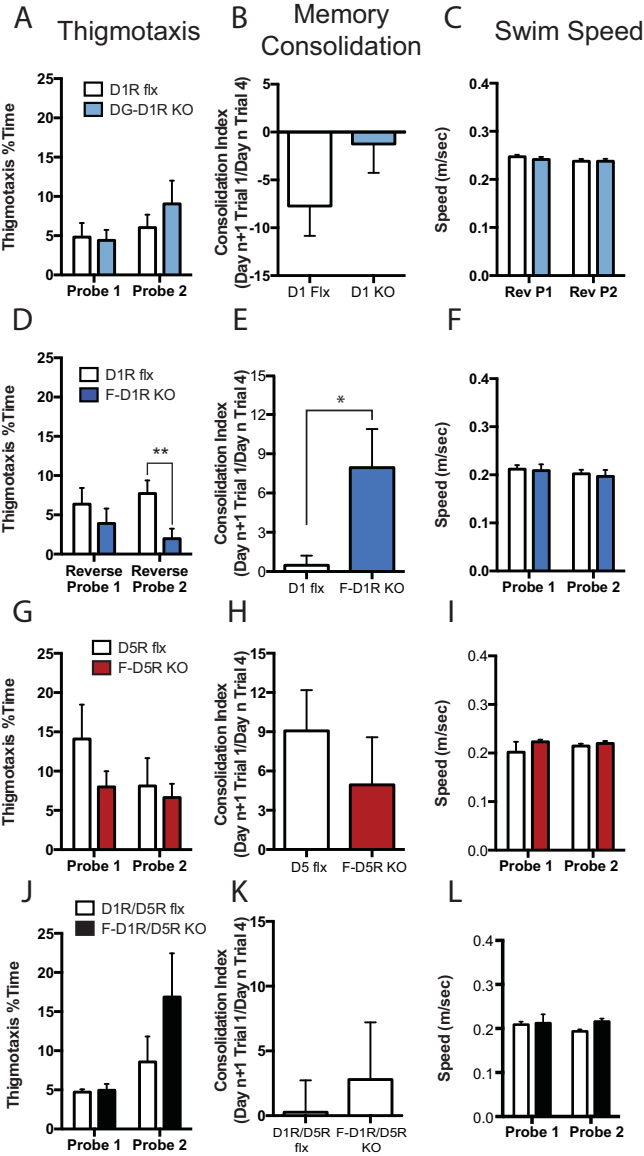

**Supplemental Figure 1.** Regular training probes 1 and 2 thigmotaxis, memory consolidation, and swim speed for all mouse lines. (A, D, G, J) Thigmotaxis. (B, E, H, K) Memory consolidation. (C, F, I, L) Swim speed. Probe 1 - (D1R flx, n = 16, DG-D1R KO = 15; D1R flx, n = 11; F-D1R KO = 10; D5R flx, n = 8, F-D5R KO = 10; D1R/D5R flx, n = 7; FD1R/D5R KO = 8). Probe 2 - (D1R flx, n = 16, DG-D1R KO = 15; D1R flx, n = 11; F-D1R KO = 10; D5R flx, n = 8, F-D5R KO = 10; D1R/D5R flx, n = 8; F-D1R/D5R KO = 8).

**Supplemental Figure 2.** *In Situ* Hybridization. (A and B) D1R mRNA Probe for D1R/D5R flx and F-D1R/D5R KO mouse, respectively. (C and D) D5R mRNA Probe for D1R/D5R flx and F-D1R/D5R KO mouse, respectively.

**Supplemental Figure 3.** Gross motor activity in flx (D1R or D5R) controls and forebrain KO (D1R or D5R) animals. (A and B) Open field total distance (D1R flx, n = 7; F-D1R KO = 9; D5R flx, n = 15, F-D5R KO = 17). (C and D) Rotarod motor test (D1R flx, n = 7; F-D1R KO = 9; D5R flx, n = 7, F-D5R KO = 9).

**Supplemental Figure 4.** Reversal probes 1 and 2 thigmotaxis, memory consolidation, and swim speed for all mouse lines. (A, D, G, J) Thigmotaxis. (B, E, H, K) Memory consolidation. (C, F, I, L) Swim speed. Probe 1 - (D1R flx, n = 16, DG-D1R KO = 15; D1R flx, n = 11; F-D1R KO = 10; D5R flx, n = 8, F-D5R KO = 10; D1R/D5R flx, n = 7; F-D1R/D5R KO = 7). Probe 2 - (D1R flx, n = 16, DG-D1R KO = 15; D1R flx, n = 11; F-D1R KO = 10; D5R flx, n = 8, F-D5R KO = 10; D1R/D5R flx, n = 7; F-D1R/D5R KO = 8).
